# Supplementary material for: Supportive Care in Radiotherapy Based on a Mobile App: Prospective Multicenter Survey
Source: PubMed Central journal article supplement (PMC6137282; doi:10.2196/10916), 2018-08-30
Supplement: mhealth_v6i8e10916_app2.pdf [file mhealth_v6i8e10916_app2.pdf]

## Supplementary file: Scoring System

### Scoring of questions

| Scale | Question | Answer | Value |  |
|-------|----------|--------|-------|--|
| AOI1  | Q3       | A      | 2     |  |
|       |          | B      | 1     |  |
|       | Q7       | A      | 1     |  |
|       |          | B      | 2     |  |
|       |          | C      | 3     |  |
|       |          | D      | 4     |  |
|       | Q8       | A      | 2     |  |
|       |          | B      | 1     |  |
|       |          |        |       |  |
| AOI2  | Q4       | A      | 5     |  |
|       |          | B      | 4     |  |
|       |          | C      | 3     |  |
|       |          | D      | 2     |  |
|       |          | E      | 1     |  |
|       | Q6       | A      | 1     |  |
|       |          | B      | 2     |  |
|       |          | C      | 3     |  |
|       |          | D      | 4     |  |
|       |          |        |       |  |
|       |          |        |       |  |
|       |          |        |       |  |
| AOI3  | Q9       | A      | 5     |  |
|       |          | B      | 4     |  |
|       |          | C      | 3     |  |
|       |          | D      | 2     |  |
|       |          | E      | 1     |  |
|       | Q14      | A      | 5     |  |
|       |          | B      | 4     |  |
|       |          | C      | 3     |  |
|       |          | D      | 2     |  |
|       |          | E      | 1     |  |
|       | Q20      | A      | 5     |  |
|       |          | B      | 4     |  |
|       |          | C      | 3     |  |
|       |          | D      | 2     |  |
|       |          | E      | 1     |  |
|       | Q21      | A      | 5     |  |
|       |          | B      | 4     |  |
|       |          | C      | 3     |  |
|       |          | D      | 2     |  |
|       |          | E      | 1     |  |
|       | Q22      | A      | 2     |  |
|       |          | B      | 1     |  |
|       | Q27      | A      | 5     |  |
|       |          | B      | 4     |  |
|       |          | C      | 3     |  |
| D     |          | 2      |       |  |
| E     |          | 1      |       |  |
| AOI4  | Q11      | A      | 5     |  |
|       |          | B      | 4     |  |
|       |          | C      | 3     |  |
|       |          | D      | 2     |  |

|      |     |   |   |
|------|-----|---|---|
|      |     | E | 1 |
|      | Q12 | A | 5 |
|      |     | B | 4 |
|      |     | C | 3 |
|      |     | D | 2 |
|      |     | E | 1 |
| AOI5 | Q23 | A | 5 |
|      |     | B | 4 |
|      |     | C | 3 |
|      |     | D | 2 |
|      |     | E | 1 |
|      | Q24 | A | 5 |
|      |     | B | 4 |
|      |     | C | 3 |
|      |     | D | 2 |
|      |     | E | 1 |
|      | Q25 | A | 1 |
|      |     | B | 2 |
|      |     | C | 3 |
|      |     | D | 4 |
|      |     | E | 5 |
| AOI6 | Q15 | A | 1 |
|      |     | B | 2 |
|      |     | C | 3 |
|      |     | D | 4 |
|      |     | E | 5 |
|      | Q16 | A | 5 |
|      |     | B | 4 |
|      |     | C | 3 |
|      |     | D | 2 |
|      |     | E | 1 |
|      | Q17 | A | 5 |
|      |     | B | 4 |
|      |     | C | 3 |
|      |     | D | 2 |
|      |     | E | 1 |

| Scale | Description                       | Items                           | Min | Max | Range |
|-------|-----------------------------------|---------------------------------|-----|-----|-------|
| AOI1  | Habits of smartphoe use           | Q3 + Q7 + Q8                    | 3   | 8   | 5     |
| AOI2  | Technical knowledge and abilities | Q4 + Q6                         | 2   | 9   | 7     |
| AOI3  | Readiness to use app              | Q9 + Q14 + Q20 + Q21 + Q22+ Q27 | 6   | 27  | 21    |
| AOI4  | Possible features of mobile app   | Q11 + Q12                       | 2   | 10  | 8     |
| AOI5  | Timeframe of reachability         | Q23 + Q24 + Q25                 | 3   | 15  | 12    |
| AOI6  | General attitude                  | Q15 + Q16 + Q17                 | 3   | 15  | 12    |

**Calculation of sum scores**

**Calculation of transformed scale values:**

$$\frac{[real\ value - smallest\ possible\ value]}{possible\ range} * 100$$

The smallest possible value of the scales is listed in the column “min” and the possible range is listed in the column “range”. The transformed scale has a minimum value of 0 and a maximum value of 100.
