# Supplementary material for: Supportive Care in Radiotherapy Based on a Mobile App: Prospective Multicenter Survey
Source: PubMed Central journal article supplement (PMC6137282; doi:10.2196/10916), 2018-08-30
Supplement: mhealth_v6i8e10916_app3.pdf [file mhealth_v6i8e10916_app3.pdf]

---

**Descriptive statistics before  
RT**

|                                                 | <b>Total<br/>(n = 200)</b> |
|-------------------------------------------------|----------------------------|
| <b>Q3</b>                                       |                            |
| 1 (B)                                           | 52 (26.8%)                 |
| 2 (A)                                           | 142 (73.2%)                |
| Missing                                         | 6                          |
| <b>Q4</b>                                       |                            |
| 1 (E)                                           | 1 (0.5%)                   |
| 2 (D)                                           | 10 (5.1%)                  |
| 3 (C)                                           | 56 (28.3%)                 |
| 4 (B)                                           | 72 (36.4%)                 |
| 5 (A)                                           | 59 (29.8%)                 |
| Missing                                         | 2                          |
| <b>Q5 (multiple<br/>responses<br/>possible)</b> |                            |
| A                                               | 67 (44.4%)                 |
| B                                               | 62 (41.1%)                 |
| C                                               | 44 (29.1%)                 |
| D                                               | 3 (2.0%)                   |
| E                                               | 1 (0.6%)                   |
| Missing                                         | 49                         |
| <b>Q6</b>                                       |                            |
| 1 (A)                                           | 13 (6.7%)                  |
| 2 (B)                                           | 57 (29.4%)                 |
| 3 (C)                                           | 97 (50.0%)                 |
| 4 (D)                                           | 27 (13.9%)                 |
| Missing                                         | 6                          |
| <b>Q7</b>                                       |                            |
| 1 (A)                                           | 21 (10.5%)                 |
| 2 (B)                                           | 86 (43.0%)                 |
| 3 (C)                                           | 45 (22.5%)                 |
| 4 (D)                                           | 48 (24.0%)                 |
| Missing                                         | 0                          |

---

**Descriptive statistics before  
RT****Total  
(n = 200)**

---

## Q8

|         |             |
|---------|-------------|
| 1 (B)   | 150 (75.8%) |
| 2 (A)   | 48 (24.2%)  |
| Missing | 2           |

## Q9

|         |            |
|---------|------------|
| 1 (E)   | 1 (0.5%)   |
| 2 (D)   | 5 (2.5%)   |
| 3 (C)   | 47 (23.6%) |
| 4 (B)   | 98 (49.2%) |
| 5 (A)   | 48 (24.1%) |
| Missing | 1          |

Q10 (multiple  
responses  
possible)

|         |             |
|---------|-------------|
| A       | 176 (88.4%) |
| B       | 134 (67.3%) |
| C       | 130 (65.3%) |
| D       | 12 (6.0%)   |
| Missing | 1           |

## Q11

|         |             |
|---------|-------------|
| 1 (E)   | 4 (2.0%)    |
| 2 (D)   | 4 (2.0%)    |
| 3 (C)   | 25 (12.6%)  |
| 4 (B)   | 110 (55.3%) |
| 5 (A)   | 56 (28.1%)  |
| Missing | 1           |

## Q12

|         |             |
|---------|-------------|
| 1 (E)   | 3 (1.5%)    |
| 2 (D)   | 2 (1.0%)    |
| 3 (C)   | 11 (5.6%)   |
| 4 (B)   | 100 (50.5%) |
| 5 (A)   | 82 (41.4%)  |
| Missing | 2           |

---

**Descriptive statistics before  
RT****Total  
(n = 200)**

---

Q13 (multiple  
responses  
possible)

|         |             |
|---------|-------------|
| A       | 176 (88.0%) |
| B       | 130 (65.0%) |
| C       | 138 (69.0%) |
| D       | 163 (81.5%) |
| E       | 7 (3.5%)    |
| Missing | 0           |

Q14

|         |            |
|---------|------------|
| 1 (E)   | 37 (19.2%) |
| 2 (D)   | 32 (16.6%) |
| 3 (C)   | 98 (50.8%) |
| 4 (B)   | 14 (7.3%)  |
| 5 (A)   | 12 (6.2%)  |
| Missing | 7          |

Q15

|         |            |
|---------|------------|
| 1 (A)   | 7 (3.6%)   |
| 2 (B)   | 8 (4.1%)   |
| 3 (C)   | 67 (34.4%) |
| 4 (D)   | 56 (28.7%) |
| 5 (E)   | 57 (29.2%) |
| Missing | 5          |

Q16

|         |             |
|---------|-------------|
| 1 (E)   | 43 (22.1%)  |
| 2 (D)   | 102 (52.3%) |
| 3 (C)   | 38 (19.5%)  |
| 4 (B)   | 12 (6.2%)   |
| Missing | 5           |

Q17

|       |            |
|-------|------------|
| 1 (E) | 89 (45.6%) |
| 2 (D) | 90 (46.2%) |
| 3 (C) | 14 (7.2%)  |

---

**Descriptive statistics before  
RT****Total  
(n = 200)**

---

|         |          |
|---------|----------|
| 4 (B)   | 2 (1.0%) |
| Missing | 5        |

**Q18**

|         |             |
|---------|-------------|
| A       | 47 (24.1%)  |
| B       | 137 (70.3%) |
| C       | 10 (5.1%)   |
| D       | 1 (0.5%)    |
| E       | 0 (0.0%)    |
| Missing | 5           |

**Q19**

|         |             |
|---------|-------------|
| A       | 75 (40.0%)  |
| B       | 105 (55.9%) |
| C       | 8 (4.3%)    |
| D       | 0 (0.0%)    |
| E       | 0 (0.0%)    |
| Missing | 12          |

**Q20**

|         |             |
|---------|-------------|
| 1 (E)   | 5 (2.5%)    |
| 2 (D)   | 8 (4.0%)    |
| 3 (C)   | 28 (14.1%)  |
| 4 (B)   | 115 (58.1%) |
| 5 (A)   | 42 (21.2%)  |
| Missing | 2           |

**Q21**

|         |            |
|---------|------------|
| 1 (E)   | 4 (2.0%)   |
| 2 (D)   | 20 (10.2%) |
| 3 (C)   | 33 (16.8%) |
| 4 (B)   | 80 (40.6%) |
| 5 (A)   | 60 (30.5%) |
| Missing | 3          |

**Q22**

---

**Descriptive statistics before  
RT**

|         | <b>Total<br/>(n = 200)</b> |
|---------|----------------------------|
| 1 (B)   | 8 (4.1%)                   |
| 2 (A)   | 186 (95.9%)                |
| Missing | 6                          |

**Q23**

|         |            |
|---------|------------|
| 1 (E)   | 12 (6.2%)  |
| 2 (D)   | 51 (26.2%) |
| 3 (C)   | 59 (30.3%) |
| 4 (B)   | 44 (22.6%) |
| 5 (A)   | 29 (14.9%) |
| Missing | 5          |

**Q24**

|         |            |
|---------|------------|
| 1 (E)   | 6 (3.1%)   |
| 2 (D)   | 42 (21.5%) |
| 3 (C)   | 60 (30.8%) |
| 4 (B)   | 57 (29.2%) |
| 5 (A)   | 30 (15.4%) |
| Missing | 5          |

**Q25**

|         |            |
|---------|------------|
| 1 (A)   | 13 (6.6%)  |
| 2 (B)   | 23 (11.7%) |
| 3 (C)   | 39 (19.8%) |
| 4 (D)   | 79 (40.1%) |
| 5 (E)   | 43 (21.8%) |
| Missing | 3          |

**Q26**

|         |            |
|---------|------------|
| A       | 8 (4.1%)   |
| B       | 65 (33.0%) |
| C       | 60 (30.5%) |
| D       | 54 (27.4%) |
| E       | 10 (5.1%)  |
| Missing | 3          |

**Q27**

---

**Descriptive statistics before  
RT**

|         | <b>Total<br/>(n = 200)</b> |
|---------|----------------------------|
| 1 (E)   | 2 (1.0%)                   |
| 2 (D)   | 5 (2.5%)                   |
| 3 (C)   | 29 (14.6%)                 |
| 4 (B)   | 115 (58.1%)                |
| 5 (A)   | 47 (23.7%)                 |
| Missing | 2                          |

**AOI1**

|              |              |
|--------------|--------------|
| N            | 192          |
| Missing      | 8            |
| Mean         | 52.2         |
| SD           | 27.22        |
| Median       | 50           |
| Q1 -- Q3     | 40 -- 80     |
| Min. -- Max. | 0.0 -- 100.0 |

**AOI2**

|              |              |
|--------------|--------------|
| N            | 193          |
| Missing      | 7            |
| Mean         | 66.2         |
| SD           | 21.39        |
| Median       | 71.4         |
| Q1 -- Q3     | 42.9 -- 85.7 |
| Min. -- Max. | 0.0 -- 100.0 |

**AOI3**

|              |              |
|--------------|--------------|
| N            | 188          |
| Missing      | 12           |
| Mean         | 68.6         |
| SD           | 14.44        |
| Median       | 71.4         |
| Q1 -- Q3     | 61.9 -- 76.2 |
| Min. -- Max. | 19.0 -- 95.2 |

**AOI4**

|         |     |
|---------|-----|
| N       | 197 |
| Missing | 3   |

---

**Descriptive statistics before  
RT**

|              | <b>Total<br/>(n = 200)</b> |
|--------------|----------------------------|
| Mean         | 79.4                       |
| SD           | 17.01                      |
| Median       | 75                         |
| Q1 -- Q3     | 75 -- 87.5                 |
| Min. -- Max. | 0.0 -- 100.0               |

**AOI5**

|              |               |
|--------------|---------------|
| N            | 192           |
| Missing      | 8             |
| Mean         | 58.8          |
| SD           | 18.58         |
| Median       | 58.3          |
| Q1 -- Q3     | 41.7 -- 66.7  |
| Min. -- Max. | 16.7 -- 100.0 |

**AOI6**

|              |             |
|--------------|-------------|
| N            | 189         |
| Missing      | 11          |
| Mean         | 37.5        |
| SD           | 13.47       |
| Median       | 33.3        |
| Q1 -- Q3     | 25 -- 50    |
| Min. -- Max. | 0.0 -- 75.0 |

---
