# Supplementary material for: Supportive Care in Radiotherapy Based on a Mobile App: Prospective Multicenter Survey
Source: PubMed Central journal article supplement (PMC6137282; doi:10.2196/10916), 2018-08-30
Supplement: mhealth_v6i8e10916_app4.pdf [file mhealth_v6i8e10916_app4.pdf]

---

**Descriptive statistics after RT**

|                                         | <b>Total<br/>(n = 140)</b> |
|-----------------------------------------|----------------------------|
| <b>Q3</b>                               |                            |
| 1 (B)                                   | 36 (25.9%)                 |
| 2 (A)                                   | 103 (74.1%)                |
| Missing                                 | 1                          |
| <b>Q4</b>                               |                            |
| 2 (D)                                   | 4 (2.9%)                   |
| 3 (C)                                   | 40 (28.8%)                 |
| 4 (B)                                   | 54 (38.8%)                 |
| 5 (A)                                   | 41 (29.5%)                 |
| Missing                                 | 1                          |
| <b>Q5 (multiple responses possible)</b> |                            |
| A                                       | 50 (46.3%)                 |
| B                                       | 41 (38.0%)                 |
| C                                       | 27 (25.0%)                 |
| D                                       | 4 (3.7%)                   |
| E                                       | 4 (3.7%)                   |
| Missing                                 | 42                         |
| <b>Q6</b>                               |                            |
| 1 (A)                                   | 6 (4.3%)                   |
| 2 (B)                                   | 39 (27.9%)                 |
| 3 (C)                                   | 66 (47.1%)                 |
| 4 (D)                                   | 29 (20.7%)                 |
| Missing                                 | 0                          |
| <b>Q7</b>                               |                            |
| 1 (A)                                   | 16 (11.4%)                 |
| 2 (B)                                   | 53 (37.9%)                 |
| 3 (C)                                   | 33 (23.6%)                 |
| 4 (D)                                   | 38 (27.1%)                 |
| Missing                                 | 0                          |

---

**Descriptive statistics after  
RT**

|                                                  | <b>Total<br/>(n = 140)</b> |
|--------------------------------------------------|----------------------------|
| <b>Q8</b>                                        |                            |
| 1 (B)                                            | 84 (60.4%)                 |
| 2 (A)                                            | 55 (39.6%)                 |
| Missing                                          | 1                          |
| <b>Q9</b>                                        |                            |
| 1 (E)                                            | 6 (4.3%)                   |
| 2 (D)                                            | 3 (2.2%)                   |
| 3 (C)                                            | 32 (23.0%)                 |
| 4 (B)                                            | 63 (45.3%)                 |
| 5 (A)                                            | 35 (25.2%)                 |
| Missing                                          | 1                          |
| <b>Q10 (multiple<br/>responses<br/>possible)</b> |                            |
| A                                                | 116 (85.3%)                |
| B                                                | 86 (63.2%)                 |
| C                                                | 76 (55.9%)                 |
| D                                                | 9 (6.6%)                   |
| Missing                                          | 4                          |
| <b>Q11</b>                                       |                            |
| 1 (E)                                            | 7 (5.0%)                   |
| 2 (D)                                            | 5 (3.6%)                   |
| 3 (C)                                            | 20 (14.3%)                 |
| 4 (B)                                            | 72 (51.4%)                 |
| 5 (A)                                            | 36 (25.7%)                 |
| Missing                                          | 0                          |
| <b>Q12</b>                                       |                            |
| 1 (E)                                            | 6 (4.3%)                   |
| 2 (D)                                            | 3 (2.1%)                   |
| 3 (C)                                            | 13 (9.3%)                  |
| 4 (B)                                            | 66 (47.1%)                 |
| 5 (A)                                            | 52 (37.1%)                 |
| Missing                                          | 0                          |

---

**Descriptive statistics after  
RT****Total  
(n = 140)**

---

Q13 (multiple  
responses  
possible)

|         |             |
|---------|-------------|
| A       | 107 (78.7%) |
| B       | 79 (58.1%)  |
| C       | 91 (66.9%)  |
| D       | 103 (75.7%) |
| E       | 5 (3.7%)    |
| Missing | 0           |

Q14

|         |            |
|---------|------------|
| 1 (E)   | 41 (30.4%) |
| 2 (D)   | 29 (21.5%) |
| 3 (C)   | 56 (41.5%) |
| 4 (B)   | 7 (5.2%)   |
| 5 (A)   | 2 (1.5%)   |
| Missing | 5          |

Q15

|         |            |
|---------|------------|
| 2 (B)   | 3 (2.2%)   |
| 3 (C)   | 51 (37.2%) |
| 4 (D)   | 35 (25.5%) |
| 5 (E)   | 48 (35.0%) |
| Missing | 3          |

Q16

|         |            |
|---------|------------|
| 1 (E)   | 42 (30.7%) |
| 2 (D)   | 57 (41.6%) |
| 3 (C)   | 34 (24.8%) |
| 4 (B)   | 3 (2.2%)   |
| 5 (A)   | 1 (0.7%)   |
| Missing | 3          |

Q17

|       |            |
|-------|------------|
| 1 (E) | 55 (40.1%) |
| 2 (D) | 65 (47.4%) |

---

**Descriptive statistics after  
RT****Total  
(n = 140)**

---

|         |            |
|---------|------------|
| 3 (C)   | 15 (10.9%) |
| 4 (B)   | 1 (0.7%)   |
| 5 (A)   | 1 (0.7%)   |
| Missing | 3          |

**Q18**

|         |            |
|---------|------------|
| A       | 43 (31.6%) |
| B       | 82 (60.3%) |
| C       | 10 (7.4%)  |
| D       | 0 (0%)     |
| E       | 1 (0.7%)   |
| Missing | 4          |

**Q19**

|         |            |
|---------|------------|
| A       | 66 (48.2%) |
| B       | 61 (44.5%) |
| C       | 8 (5.8%)   |
| D       | 1 (0.7%)   |
| E       | 1 (0.7%)   |
| Missing | 3          |

**Q20**

|         |            |
|---------|------------|
| 1 (E)   | 3 (2.2%)   |
| 2 (D)   | 9 (6.6%)   |
| 3 (C)   | 24 (17.5%) |
| 4 (B)   | 69 (50.4%) |
| 5 (A)   | 32 (23.4%) |
| Missing | 3          |

**Q21**

|         |            |
|---------|------------|
| 1 (E)   | 4 (2.9%)   |
| 2 (D)   | 14 (10.0%) |
| 3 (C)   | 23 (16.4%) |
| 4 (B)   | 58 (41.4%) |
| 5 (A)   | 41 (29.3%) |
| Missing | 0          |

---

**Descriptive statistics after  
RT****Total  
(n = 140)**

---

## Q22

|         |             |
|---------|-------------|
| 1 (B)   | 5 (3.6%)    |
| 2 (A)   | 133 (96.4%) |
| Missing | 2           |

## Q23

|         |            |
|---------|------------|
| 1 (E)   | 12 (8.7%)  |
| 2 (D)   | 25 (18.1%) |
| 3 (C)   | 49 (35.5%) |
| 4 (B)   | 31 (22.5%) |
| 5 (A)   | 21 (15.2%) |
| Missing | 2          |

## Q24

|         |            |
|---------|------------|
| 1 (E)   | 6 (4.4%)   |
| 2 (D)   | 25 (18.2%) |
| 3 (C)   | 52 (38.0%) |
| 4 (B)   | 35 (25.5%) |
| 5 (A)   | 19 (13.9%) |
| Missing | 3          |

## Q25

|         |            |
|---------|------------|
| 1 (A)   | 10 (7.3%)  |
| 2 (B)   | 14 (10.2%) |
| 3 (C)   | 25 (18.2%) |
| 4 (D)   | 50 (36.5%) |
| 5 (E)   | 38 (27.7%) |
| Missing | 3          |

## Q26

|         |            |
|---------|------------|
| A       | 10 (7.2%)  |
| B       | 51 (36.7%) |
| C       | 37 (26.6%) |
| D       | 37 (26.6%) |
| E       | 4 (2.9%)   |
| Missing | 1          |

---

**Descriptive statistics after  
RT****Total  
(n = 140)**

---

## Q27

|         |            |
|---------|------------|
| 1 (E)   | 3 (2.2%)   |
| 2 (D)   | 7 (5.1%)   |
| 3 (C)   | 22 (15.9%) |
| 4 (B)   | 78 (56.5%) |
| 5 (A)   | 28 (20.3%) |
| Missing | 2          |

## AOI1

|              |              |
|--------------|--------------|
| N            | 138          |
| Missing      | 2            |
| Mean         | 56.4         |
| SD           | 28.72        |
| Median       | 60           |
| Q1 -- Q3     | 40 -- 80     |
| Min. -- Max. | 0.0 -- 100.0 |

## AOI2

|              |               |
|--------------|---------------|
| N            | 139           |
| Missing      | 1             |
| Mean         | 68.4          |
| SD           | 20.46         |
| Median       | 71.4          |
| Q1 -- Q3     | 50 -- 85.7    |
| Min. -- Max. | 14.3 -- 100.0 |

## AOI3

|              |              |
|--------------|--------------|
| N            | 133          |
| Missing      | 7            |
| Mean         | 65.5         |
| SD           | 15.86        |
| Median       | 66.7         |
| Q1 -- Q3     | 57.1 -- 76.2 |
| Min. -- Max. | 9.5 -- 100.0 |

## AOI4

---

**Descriptive statistics after  
RT**

|              | <b>Total<br/>(n = 140)</b> |
|--------------|----------------------------|
| N            | 140                        |
| Missing      | 0                          |
| Mean         | 75.0                       |
| SD           | 22.44                      |
| Median       | 75                         |
| Q1 -- Q3     | 62.5 -- 87.5               |
| Min. -- Max. | 0.0 -- 100.0               |

**AOI5**

|              |               |
|--------------|---------------|
| N            | 136           |
| Missing      | 4             |
| Mean         | 58.9          |
| SD           | 19.42         |
| Median       | 58.3          |
| Q1 -- Q3     | 41.7 -- 66.7  |
| Min. -- Max. | 16.7 -- 100.0 |

**AOI6**

|              |              |
|--------------|--------------|
| N            | 137          |
| Missing      | 3            |
| Mean         | 39.1         |
| SD           | 12.85        |
| Median       | 41.7         |
| Q1 -- Q3     | 33.3 -- 41.7 |
| Min. -- Max. | 8.3 -- 75.0  |

---
