# Supplementary material for: Supportive Care in Radiotherapy Based on a Mobile App: Prospective Multicenter Survey
Source: JMIR Mhealth Uhealth. 2018 Aug 30;6(8):e10916. doi: 10.2196/10916 (PMC6137282; doi:10.2196/10916)
Supplement: Multimedia Appendix 1 [file mhealth_v6i8e10916_app1.pdf]

## Supplementary file – Survey Questionnaire (English)

1. How old are you? \_\_\_\_\_ years
2. What is the name of the manufacturer/operating system of your smartphone?  
A ☐ iPhone (apple)      B ☐ Android (e.g. Samsung, htc)      C ☐ Windows  
D ☐ other      E ☐ unknown
3. Do you use a mobile internet connection (mobile data) on your smartphone or only a wifi-connection?  
A ☐ mobile data      B ☐ wifi only
4. Do you need assistance in using your smartphone?  
A ☐ never      B ☐ rarely      C ☐ sometimes      D ☐ frequently      E ☐ always
5. Who assists you in using your smartphone?  
A ☐ children/grandchildren      B ☐ partner/family      C ☐ friends/acquaintances  
D ☐ professional personnel      E ☐ others (please specify) \_\_\_\_\_
6. How would you describe your skills in using your smartphone?  
A ☐ minimal      B ☐ basic      C ☐ solid      D ☐ advanced
7. Please categorize your usage habits regarding your smartphone:  
A ☐ voice calls, instant messaging, whatsapp  
B ☐ ... additionally taking pictures, web browsing  
C ☐ ... additionally social media, facebook  
D ☐ ... intensive app use, more than 10 apps downloaded and installed
8. Have you ever used your smartphone for health-related reasons?  
A ☐ yes      B ☐ no  
Please specify: \_\_\_\_\_
9. How helpful would you regard the use of a security-certified smartphone app for additional support during radiotherapy?  
A ☐ very helpful      B ☐ helpful      C ☐ undecided  
D ☐ wenig hilfreich      E ☐ nicht hilfreich
10. Please indicate useful features and functionality of such an application from your point of view (multiple selections allowed):  
A ☐ appointment-making for radiotherapy and medical consultations  
B ☐ general queries regarding well-being  
C ☐ specific queries regarding well-being and symptoms in the context of radiotherapy and the illness being treated  
D ☐ other: \_\_\_\_\_
11. Would you regard it as helpful to use such an application after therapy completion (during follow-up) to stay in touch with your treating physicians?

A ☐ very helpful  
D ☐ not very helpful

B ☐ helpful  
E ☐ not helpful

C ☐ undecided

12. Would you regard it as helpful to be contacted by a physician if medical warning signs were detected?

A ☐ very helpful  
D ☐ not very helpful

B ☐ helpful  
E ☐ not helpful

C ☐ undecided

13. Please indicate useful features and functionality of such an application after therapy completion (during follow-up) from your point of view (multiple selections allowed):

A ☐ appointment-making for medical consultations

B ☐ general queries regarding well-being

C ☐ specific queries regarding well-being and symptoms in the context of radiotherapy

and the illness being treated

D ☐ reminder for upcoming exams and visits

E ☐ other: \_\_\_\_\_

14. What interval would you favor for answering short application-based queries regarding your well-being and possible symptoms?

A ☐ daily

B ☐ every other day

C ☐ weekly

D ☐ at the beginning and completion of therapy

E ☐ only as require

15. What interval would you favor for consulting a physician during radiotherapy?

A ☐ daily

B ☐ every other day

C ☐ weekly

D ☐ at the beginning and completion of therapy

E ☐ only as required

16. Please indicate the maximum acceptable waiting period for receiving daily radiotherapy.

A ☐ 5 minutes

B ☐ 10 minutes

C ☐ 15 minutes

D ☐ 30 minutes

E ☐ 45 minutes

17. Spontaneous consultations with a physician pose an organizational challenge and are thus associated with waiting time. Please indicate the maximum acceptable waiting period for such a spontaneous consultation.

A ☐ 5 minutes

B ☐ 10 minutes

C ☐ 15 minutes

D ☐ 30 minutes

E ☐ 45 minutes

18. Do you generally have the feeling to be understood by medical personnel regarding your requests and concerns?

A ☐ always

B ☐ mostly

C ☐ sometimes

D ☐ rarely

E ☐ never

19. Does medical personnel generally take enough time to inquire about all aspects you feel are relevant to your requests and concerns?
- A ☐ always                      B ☐ mostly                      C ☐ sometimes  
D ☐ rarely                      E ☐ never
20. Would you regard it as helpful to answer a short query regarding relevant symptoms and information prior to consulting a physician and have this information presented to the physician to help preparing for your consultation?
- A ☐ very helpful                      B ☐ helpful                      C ☐ undecided  
D ☐ not very helpful                      E ☐ not helpful
21. Would you have reservations about the safety of your medical information when using a security-certified smartphone application?
- A ☐ no reservations                      B ☐ some reservations                      C ☐ undecided  
D ☐ substantial reservations                      E ☐ major reservations
22. Would you agree to having your medical data that is collected during and after therapy anonymized and utilized for medical research?
- A ☐ yes                      B ☐ no
23. Please indicate the maximum timeframe it would take you to receive and read appointment notifications (for radiotherapy, consultations) on your smartphone (time passed from receiving to reading notification).
- A ☐ 30 minutes                      B ☐ 60 minutes                      C ☐ 2 hours  
D ☐ 12 hours                      E ☐ 2 days or longer
24. In what intervals do you generally check your smartphone for notifications (SMS, missed calls, push notifications)?
- A ☐ 30 minutes                      B ☐ 60 minutes                      C ☐ 2 hours  
D ☐ 12 hours                      E ☐ 2 days or longer
25. During which portion of the daily period between 7am and 11pm would you be reachable by telephone?
- A ☐ < 30 minutes                      B ☐ < 60 minutes                      C ☐ < 2 hours  
D ☐ < 12 hours                      E ☐ more than 12 hours
26. How worried are you about the possibility of side effects occurring during radiotherapy?
- A ☐ not worried                      B ☐ some worries                      C ☐ undecided  
D ☐ considerably worried                      E ☐ extremely worried
27. Would you consider it helpful to receive close-knit regular therapy support via a smartphone application in the context of possible side effects?
- A ☐ very helpful                      B ☐ helpful                      C ☐ undecided  
D ☐ not very helpful                      E ☐ not helpful
